# Supplementary material for: Juglone induces ferroptosis in glioblastoma cells by inhibiting the Nrf2-GPX4 axis through the phosphorylation of p38MAPK
Source: Springer Nature journal article supplement (doi:10.1186/s13020-024-00920-2), 2024-03-22
Supplement: MOESM1 [file 26899064]

## Supplementary file

**Table S1**

| Antibodies            | Source                    | Identifier |
|-----------------------|---------------------------|------------|
| ACSL4                 | Abcam                     | ab155282   |
| PTGS2                 | Abcam                     | ab15191    |
| GPX4                  | Abcam                     | ab125066   |
| Ki67                  | Abcam                     | ab16667    |
| 4HNE                  | Abcam                     | ab46545    |
| XCT                   | Cell Signaling Technology | 12691S     |
| FTH1                  | Cell Signaling Technology | 4393S      |
| p38                   | Cell Signaling Technology | 9212S      |
| pp38                  | Cell Signaling Technology | 9215S      |
| JNK                   | Cell Signaling Technology | 9251S      |
| p-JNK                 | Cell Signaling Technology | 9252S      |
| GSK3 $\alpha/\beta$   | Cell Signaling Technology | 5676S      |
| p-GSK3 $\alpha/\beta$ | Cell Signaling Technology | 8566S      |
| MMP2                  | Cell Signaling Technology | 40994S     |
| MMP9                  | Cell Signaling Technology | 13667S     |
| TFRC                  | Invitrogen                | 13-6800    |
| $\alpha$ -Tubulin     | HuaBio                    | ER130905   |
| GAPDH                 | HuaBio                    | ET1601-4   |

**Table S2**

|                                                                                          |
|------------------------------------------------------------------------------------------|
| si-Nrf2-1 sense: 5'-GCAUGCACGUGAUG AAGATT-3';<br>antisense: 5'-UCUUCAUCACGUAGCAUG CTT-3' |
| si-Nrf2-2 sense: 5'-UCUUCAUCACGUAGCAUGCTT-3';<br>antisense: 5'-GCAUGCAC GUGAUGAAGATT-3') |

Fig.S1

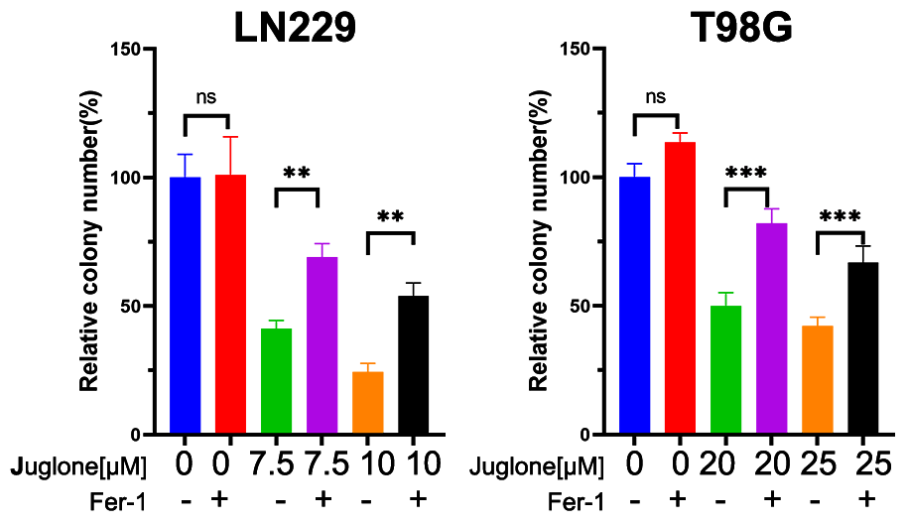

LN229 and T98G cells were treated with Juglone combined or not with Fer-1, the number of cell clones was counted and analyzed. \*\*,  $p < 0.01$ ; \*\*\*,  $p < 0.001$ ; ns, no significant difference

Fig. S2

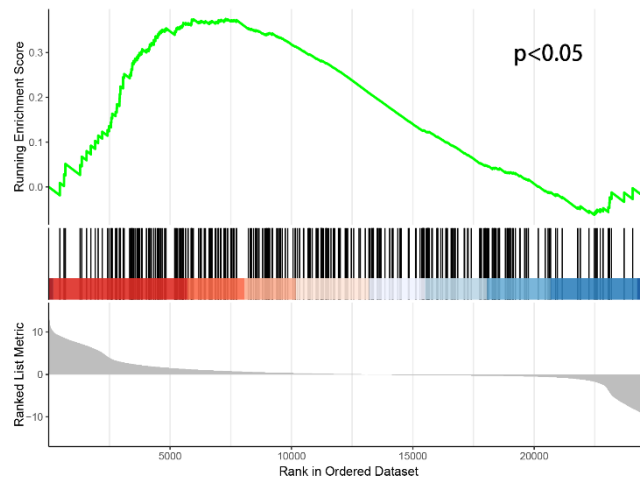

The association between the significantly different genes in the transcriptome and the ferroptosis gene dataset has been identified through the GSEA analysis using the R package “clusterProfiler”.

Fig. S3

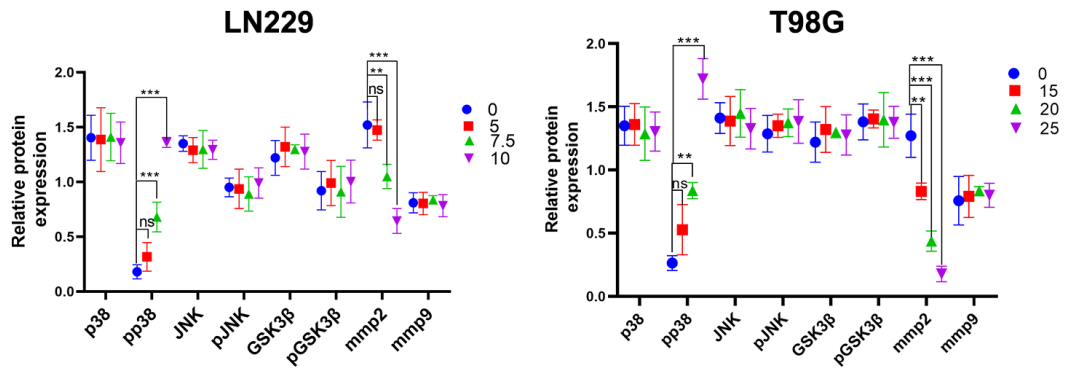

The expression of key proteins selected in LN229 and T98G cells under the action of juglone through WB experiments. \*\*,  $p < 0.01$ ; \*\*\*,  $p < 0.001$ ; ns, no significant difference.

Fig. S4

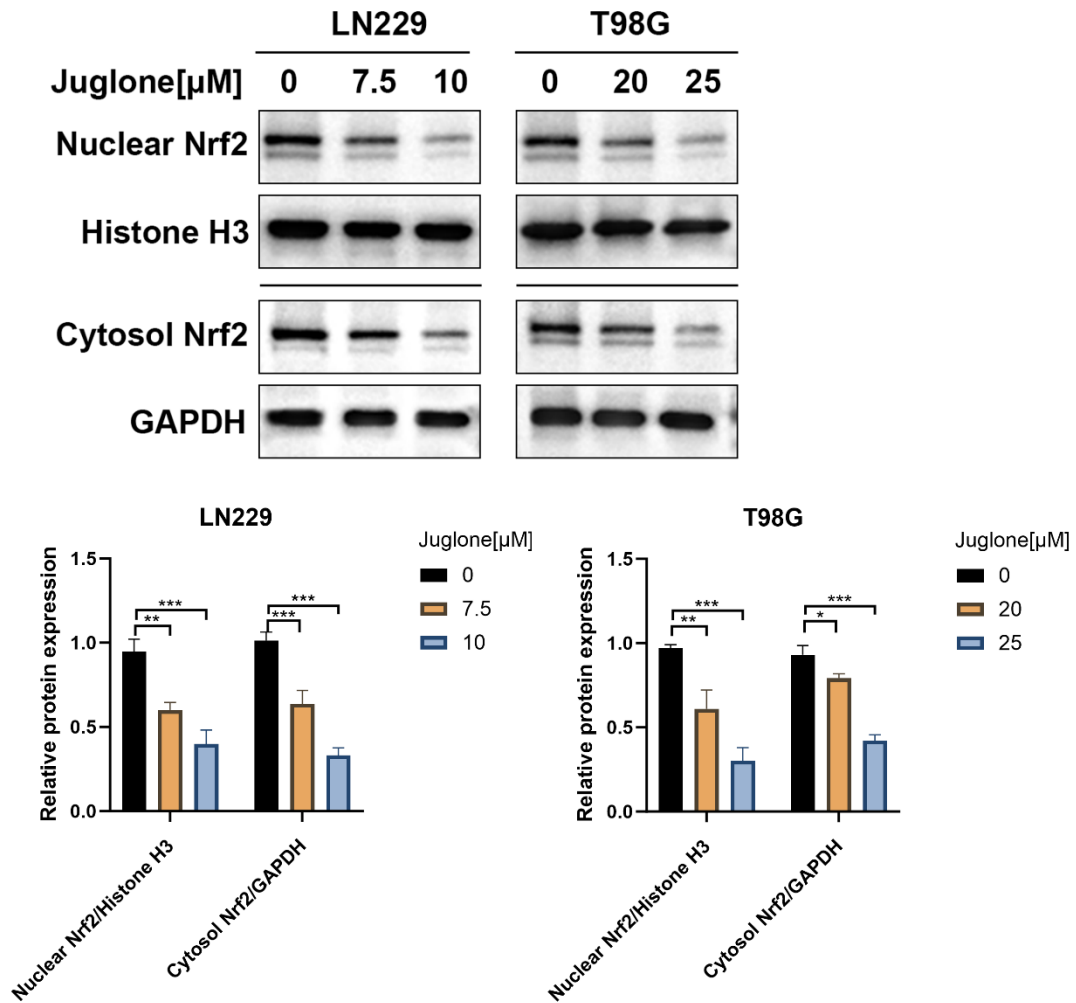

The WB experiment showed the protein expression level of Nrf2 in the cytoplasm and nucleus under the influence of juglone. \*,  $p < 0.05$ ; \*\*,  $p < 0.01$ ; \*\*\*,  $p < 0.001$ .

**Fig. S5**

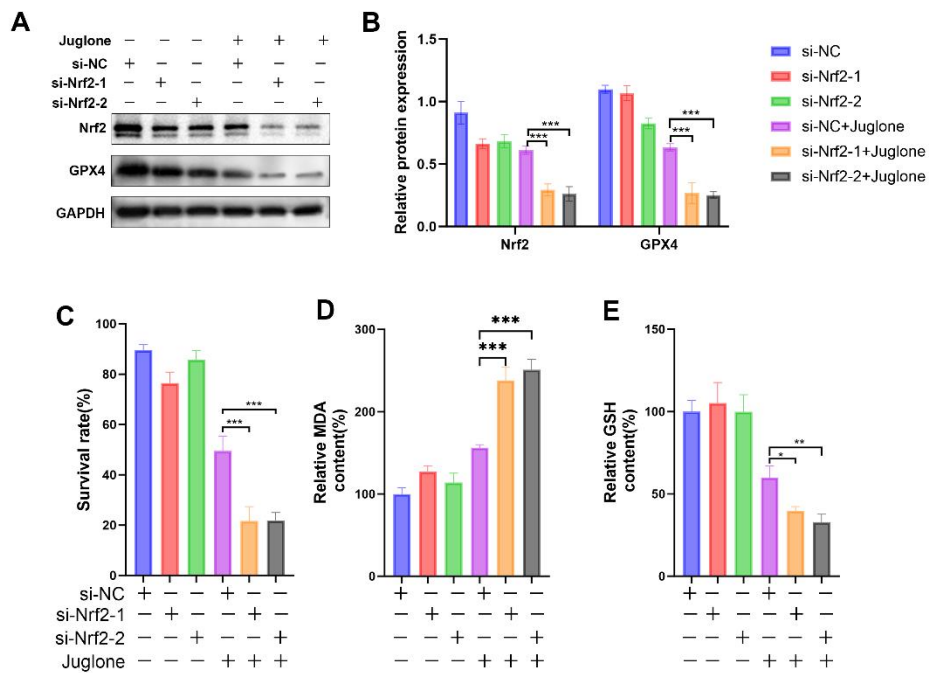

**A.B.** After Nrf2 was knocked down by siRNA, the protein expression levels of Nrf2 and GPX4 in T98G cells were further reduced 24 hours after the treatment with juglone (25 $\mu$ M). **C.** The cell survival viability was assessed by CCK8 assay. **D.E.** The levels of MDA and GSH were measured in Nrf2-knockdown T98G cells pretreated with or without juglone (25 $\mu$ M). \*, $p < 0.05$ ; \*\*, $p < 0.01$ ; \*\*\*, $p < 0.001$ .

**Fig. S6**

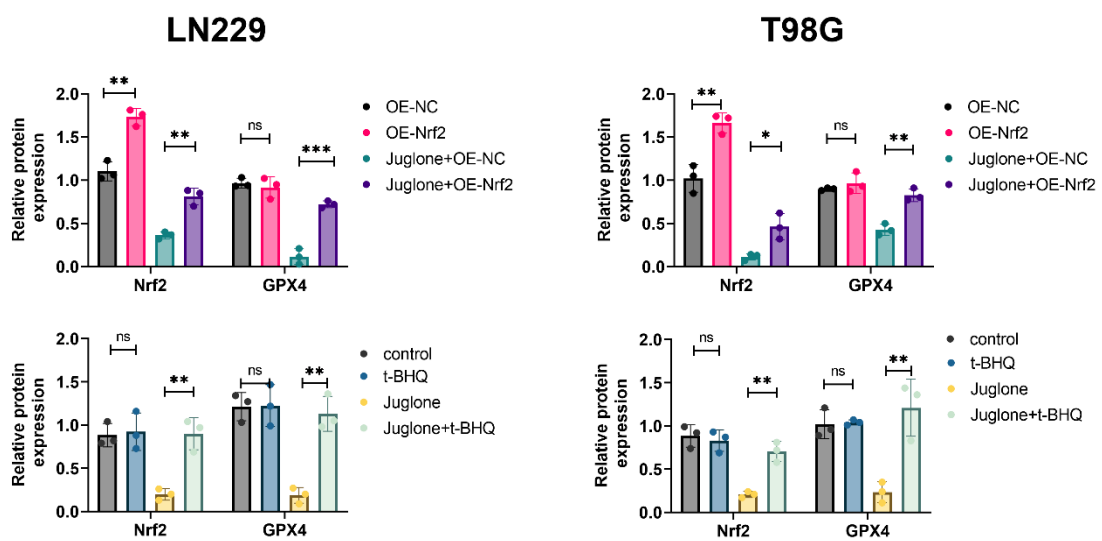

Protein expression levels of GPX4 and Nrf2 in LN229 and T98G cells after 24 hours of treatment with juglone in combination with t-BHQ (20 $\mu$ M, preprocessed for 1h) or overexpression of Nrf2,

based on WB experiment. \*, $p < 0.05$ ; \*\*,  $p < 0.01$ ; \*\*\*,  $p < 0.001$ ; ns, no significant difference
